# Supplementary material
Source: publisher site journal article supplement (https://www.dovepress.com/article/480813)
Supplement: Supplementary file 1 [file get_supplementary_file.php]

**Table 1A** Cronbach's Alpha and Item Numbers

| Cronbach's Alpha | N of Items |
| --- | --- |
| .962 | 18 |
| Item | **Loadings** |
| Item 01 | .59 |
| Item 02 | .74 |
| Item 03 | .75 |
| Item 04 | .77 |
| Item 05 | .84 |
| Item 06 | .75 |
| Item 07 | .70 |
| Item 08 | .72 |
| Item 09 | .73 |
| Item 10 | .83 |
| Item 11 | .82 |
| Item 12 | .67 |
| Item 13 | .83 |
| Item 14 | .58 |
| Item 15 | .77 |
| Item 16 | .67 |
| Item 17 | .70 |
| Item 18 | .73 |

| Extraction Method: Principal Component Analysis. |
| --- |

**Table 2A**: Correlations 01

| Variable | 1 | 2 | 3 | 4 | 5 | 6 | 7 |  |
| --- | --- | --- | --- | --- | --- | --- | --- | --- |
| Gender | - |  |  |  |  |  |  |  |
| Education | .086 | - |  |  |  |  |  |  |
| Place of Graduation | -.173 | -.656** | - |  |  |  |  |  |
| Professional Classification | -.215 | -.827** | .810** | - |  |  |  |  |
| Primary Role | -.229 | -.695** | .735** | .800** | - |  |  |  |
| Prior Work Experience | .000 | -.265* | .288* | .328** | .177 | - |  |  |
| Years Working in Medical Settings | -.220 | -.250* | .476** | .509** | .593** | .231 | - |  |
| Prior Formal Training | -.194 | .039 | -.008 | -.001 | .115 | .112 | .208 | - |
| Overall paramedics' experience and satisfaction levels | .058 | .039 | -.060 | -.027 | -.077 | -.036 | -.246 | -.184 |

* Correlation is significant at the 0.01 level (2-tailed).

** Correlation is significant at the 0.05 level (2-tailed).

**Table 3A**: Correlations 02

| Variable | 1 | 2 | 3 | 4 | 5 | 6 | 7 |  |  |  |
| --- | --- | --- | --- | --- | --- | --- | --- | --- | --- | --- |
| Gender | - |  |  |  |  |  |  |  |  |  |
| Education | .103 | - |  |  |  |  |  |  |  |  |
| Place of Graduation | -.178 | -.682** | - |  |  |  |  |  |  |  |
| Professional Classification | -.215 | -.857** | .802** | - |  |  |  |  |  |  |
| Primary Role | -.240 | -.771** | .788** | .869** | - |  |  |  |  |  |
| Prior Work Experience | .000 | -.271* | .317* | .328** | .225 | - |  |  |  |  |
| Years Working in Medical Settings | -.226 | -.271* | .534** | .520** | .571** | .250* | - |  |  |  |
| Prior Formal Training | -.194 | .031 | .021 | -.001 | .120 | .112 | .206 | - |  |  |
| Debrief and Reflection | -.058 | .061 | -.132 | -.061 | -.098 | -.112 | -.098 | -.118 | - |  |
| Clinical Reasoning | .102 | .038 | -.106 | -.008 | -.079 | -.031 | -.165 | -.040 | .716** | - |
| Clinical Learning | .065 | .015 | .012 | .034 | -.002 | -.036 | -.034 | .004 | .690** | .889** |

* Correlation is significant at the 0.01 level (2-tailed).

** Correlation is significant at the 0.05 level (2-tailed).

**Table 4A:** Correlations 03

| Variable |  |  |  |  |  |  |  |  | | |  |
| --- | --- | --- | --- | --- | --- | --- | --- | --- | --- | --- | --- |
| Age |  |  |  |  |  |  |  |  | | |  |
| Previous Workplace | .434** | - |  |  |  |  |  | |  |  | |
| Debrief and Reflection | -.304* | -.163 | - |  |  |  |  | |  |  | |
| Clinical Reasoning | -.243 | -.080 | .707** | - |  |  |  | |  |  | |
| Clinical Learning | -.212 | -.122 | .681** | .875** | - |  |  | |  |  | |
| Overall paramedics' experience and satisfaction levels | -.290* | -.141 | .919** | .915** | .892** | - |  | |  |  | |

* Correlation is significant at the 0.01 level (2-tailed).

** Correlation is significant at the 0.05 level (2-tailed).
